# Supplementary material for: Vanadium-based oxyhalide photocatalysts for visible-light-driven Z-scheme water splitting: advancing conduction band engineering
Source: Royal Society of Chemistry journal article supplement (doi:10.1039/d5ta00605h), 2025-01-01
Supplement: d5ta00605h1.pdf [file d5ta00605h1.pdf]

## *Supporting Information*

### **Vanadium-based oxyhalide photocatalysts for visible-light-driven Z-scheme water splitting: advancing conduction band engineering**

*Hajime Suzuki,<sup>a,\*</sup> Ryuki Tomita,<sup>a</sup> Yusuke Ishii,<sup>a</sup> Osamu Tomita,<sup>a</sup> Akinobu Nakada,<sup>a,b</sup> Akinori Saeki,<sup>c</sup> Ryu Abe<sup>a,\*</sup>*

<sup>a</sup> Department of Energy and Hydrocarbon Chemistry, Graduate School of Engineering, Kyoto University, Katsura, Nishikyo-ku, Kyoto 615-8510, Japan

<sup>b</sup> Precursory Research for Embryonic Science and Technology (PRESTO), Japan Science and Technology Agency (JST), 4-1-8 Honcho, Kawaguchi, Saitama 332-0012, Japan

<sup>c</sup> Department of Applied Chemistry, Graduate School of Engineering, Osaka University, 2-1 Yamadaoka, Suita, Osaka 565-0871, Japan

#### AUTHOR INFORMATION

##### **Corresponding Author**

\*E-mail: [suzuki.hajime.7x@kyoto-u.ac.jp](mailto:suzuki.hajime.7x@kyoto-u.ac.jp) (H. S.).

\*E-mail: [ryu-abe@scl.kyoto-u.ac.jp](mailto:ryu-abe@scl.kyoto-u.ac.jp) (R. A.).

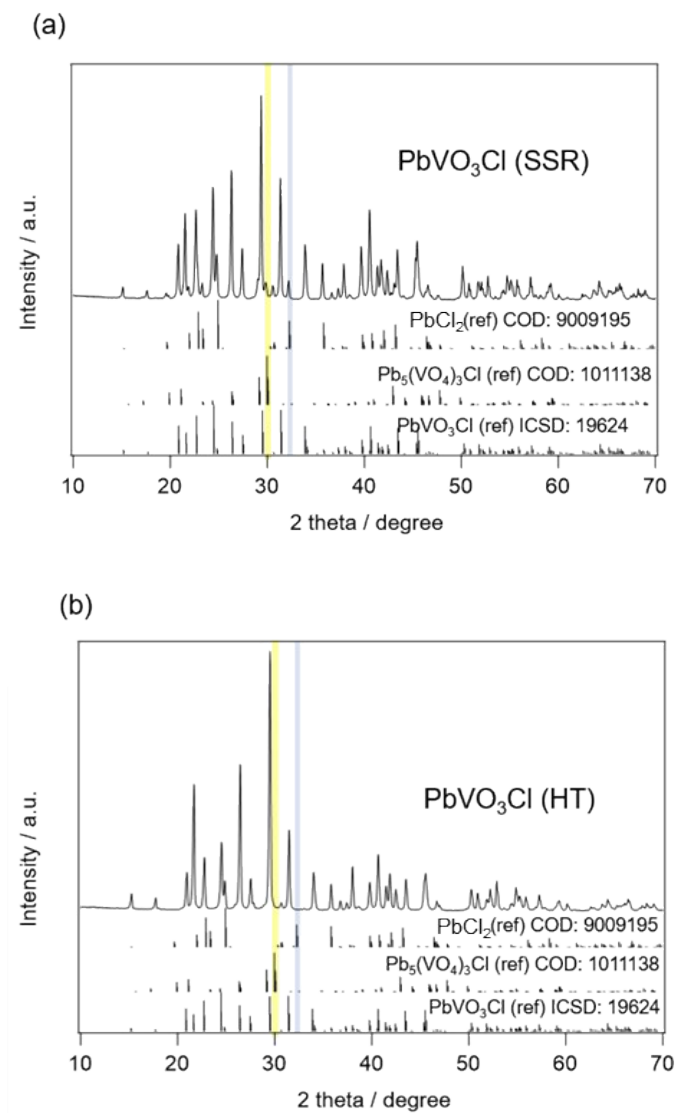

Figure S1. XRD patterns of PbVO<sub>3</sub>Cl synthesized by (a) solid-state reaction and (b) hydrothermal reaction.

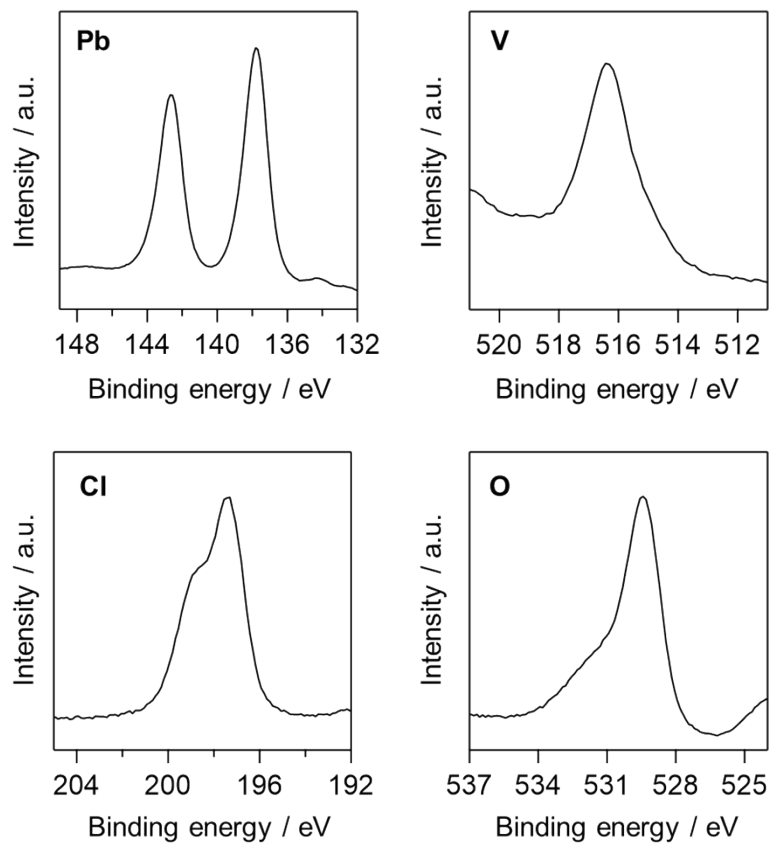

Figure S2. XPS spectra of Pb 4f, V 2p<sub>3/2</sub>, Cl 2p and O 1s for the hydrothermally synthesized PbVO<sub>3</sub>Cl. The oxidation states were evaluated with reference to the NIST XPS Database.

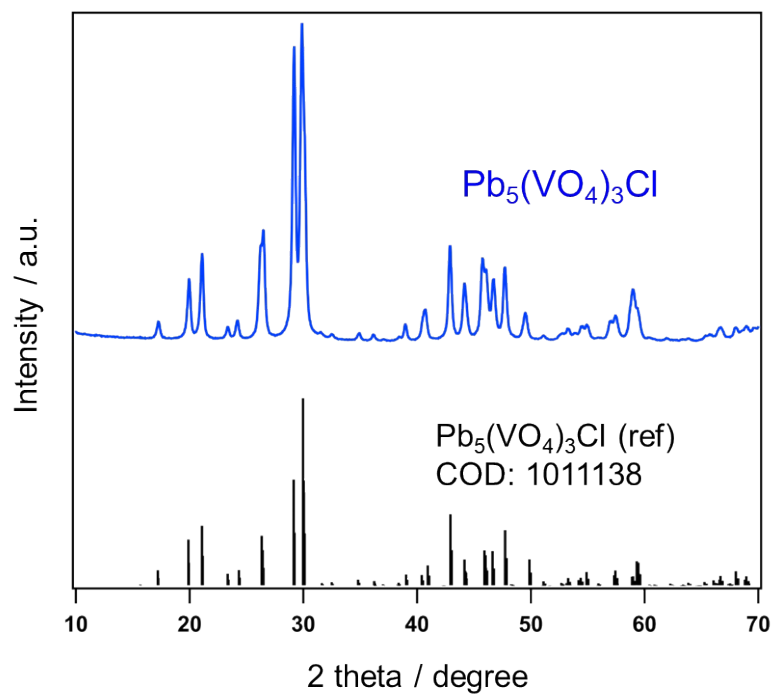

Figure S3. XRD pattern of  $\text{Pb}_5(\text{VO}_4)_3\text{Cl}$  synthesized by precipitation method.

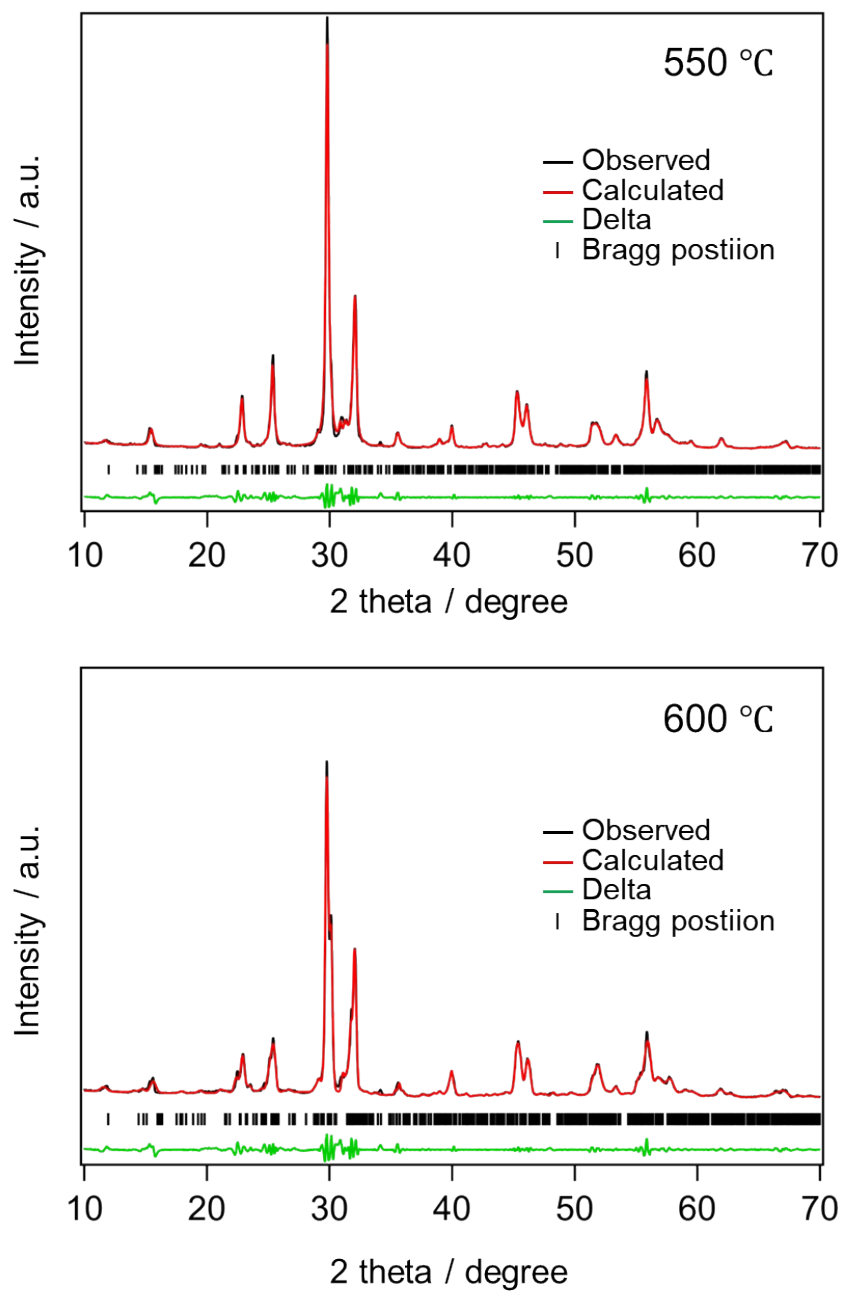

Figure S4. Le Bail refinements using XRD patterns of  $\text{Pb}_{14}(\text{VO}_4)_2\text{O}_9\text{Cl}_4$  prepared at 550 °C and 600 °C.

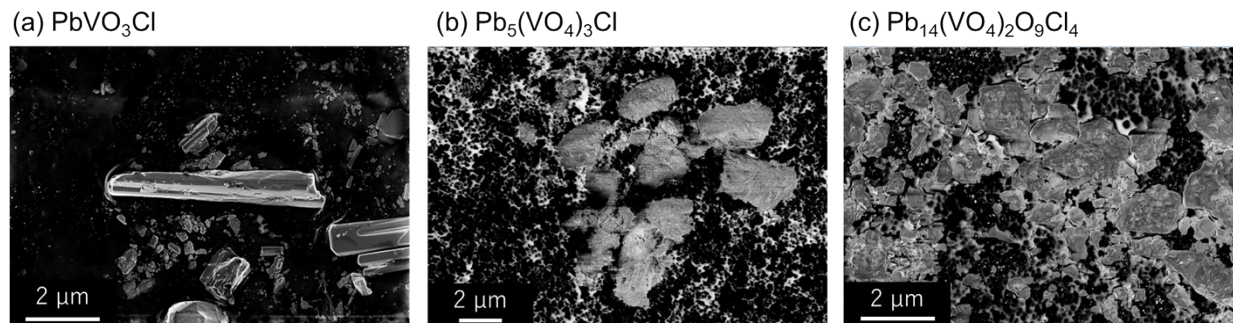

Figure S5. SEM images of (a)  $\text{PbVO}_3\text{Cl}$ , (b)  $\text{Pb}_5(\text{VO}_4)_3\text{Cl}$ , and (c)  $\text{Pb}_{14}(\text{VO}_4)_2\text{O}_9\text{Cl}_4$ . The  $\text{PbVO}_3\text{Cl}$  sample was prepared by hydrothermal reaction, and the  $\text{Pb}_{14}(\text{VO}_4)_2\text{O}_9\text{Cl}_4$  sample was prepared by solid-state reaction at 600 °C.

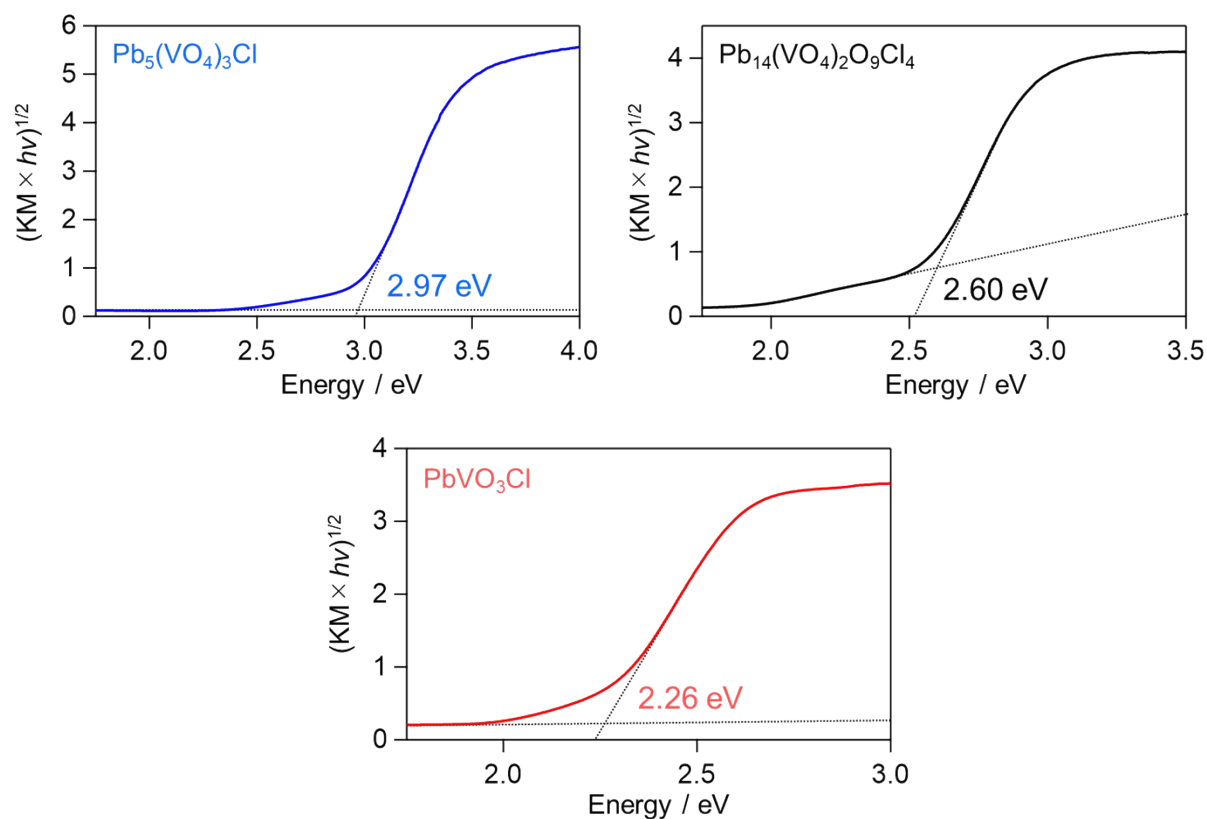

Figure S6. Tauc plots of  $\text{Pb}_5(\text{VO}_4)_3\text{Cl}$ ,  $\text{Pb}_{14}(\text{VO}_4)_2\text{O}_9\text{Cl}_4$ , and  $\text{PbVO}_3\text{Cl}$ . Based on the band structure calculations (Figure S7), these materials were suggested to be indirect bandgap semiconductors; accordingly, the coefficient for indirect transition was applied in the calculations.

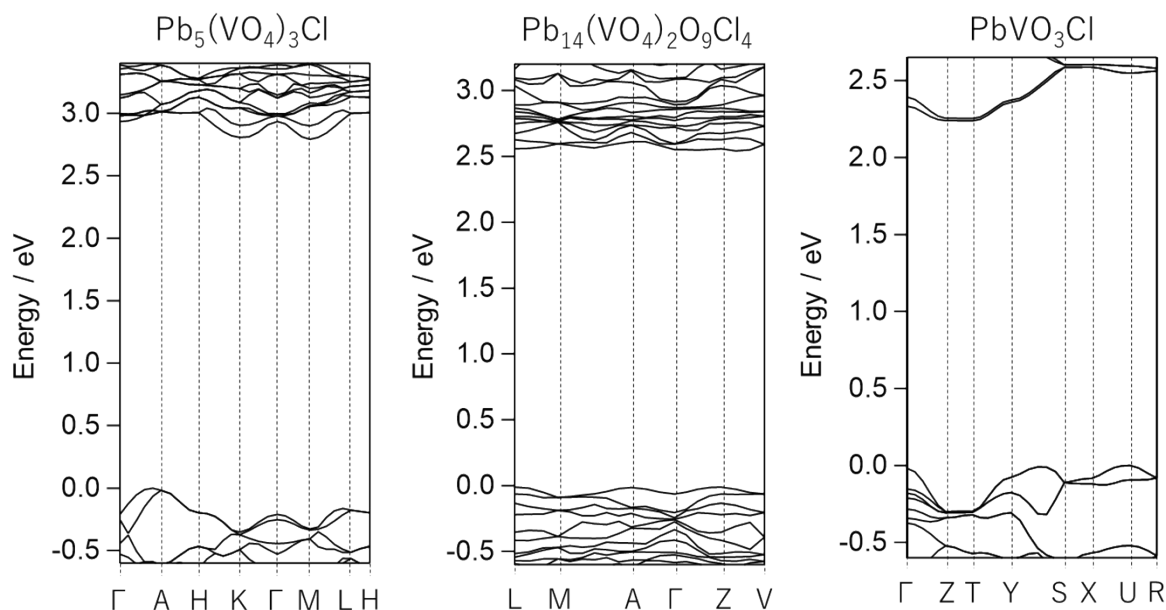

Figure S7. Band structures of  $\text{Pb}_5(\text{VO}_4)_3\text{Cl}$ ,  $\text{Pb}_{14}(\text{VO}_4)_2\text{O}_9\text{Cl}_4$ , and  $\text{PbVO}_3\text{Cl}$ .

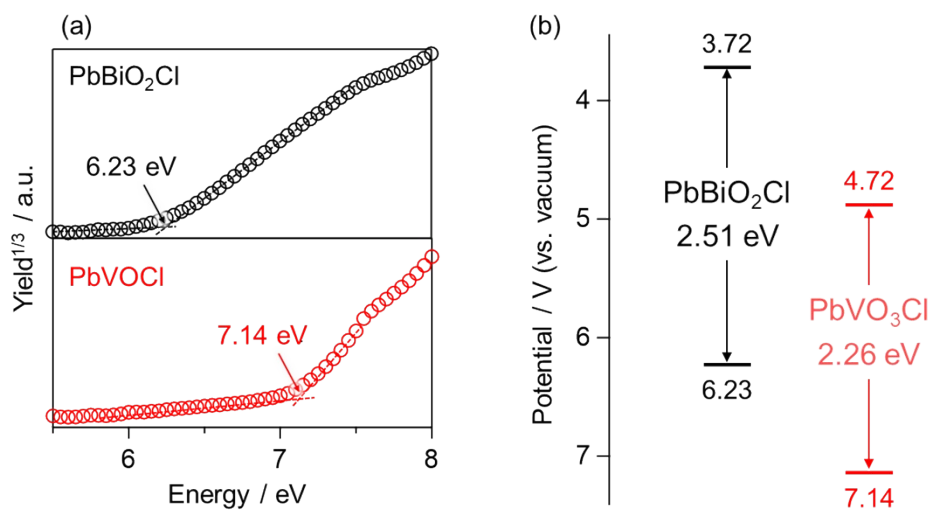

Figure S8 (a) Photoelectron yield spectra of  $\text{PbBiO}_2\text{Cl}$  and  $\text{PbVO}_3\text{Cl}$ . The spectrum of  $\text{PbBiO}_2\text{Cl}$  was cited from our previous work.<sup>[S1]</sup> (b) Band diagram estimated from the obtained ionization energies.

[S1] H. Suzuki, M. Higashi, O. Tomita, Y. Ishii, T. Yamamoto, D. Kato, T. Kotani, D. Ozaki, S. Nozawa, K. Nakashima, K. Fujita, A. Saeki, H. Kageyama, R. Abe, *Chem. Mater.* 2021, **33**, 9580-9587.

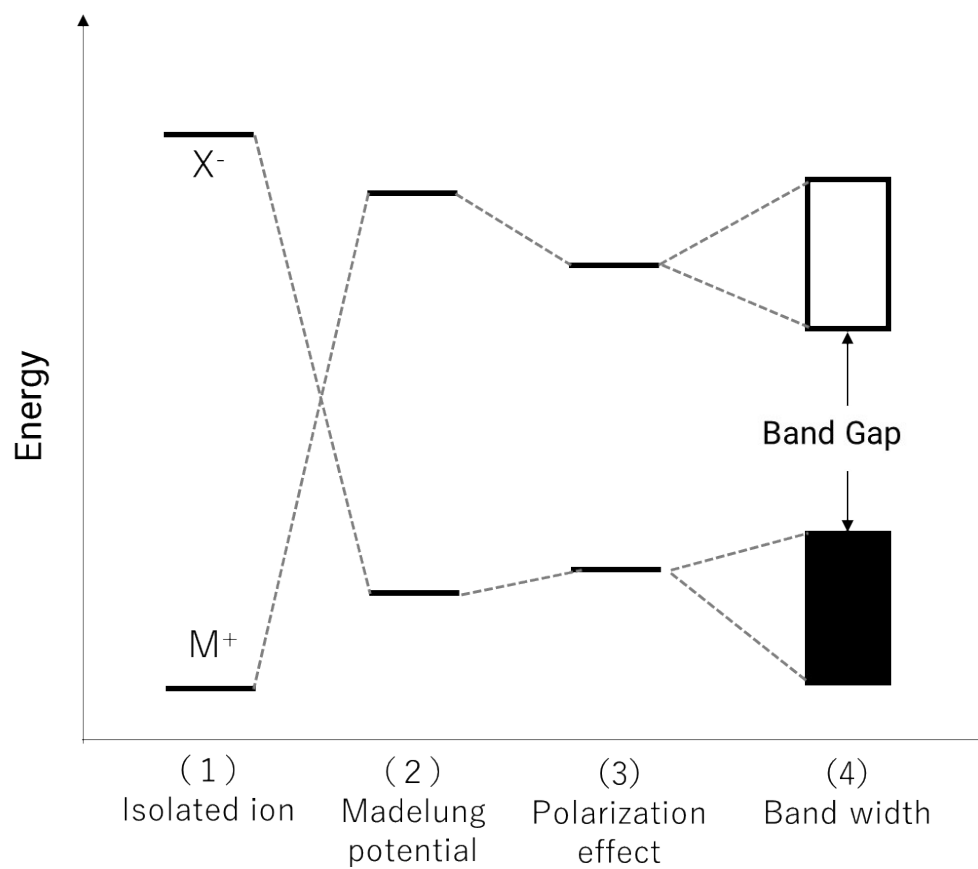

Figure S9. Band formation in solids from isolated atoms adopted and modified from Ref [S2].

[S2] P. A. Cox, *The Electronic Structure and Chemistry of Solids*; Oxford Science Publications: Oxford, 1986, 146.



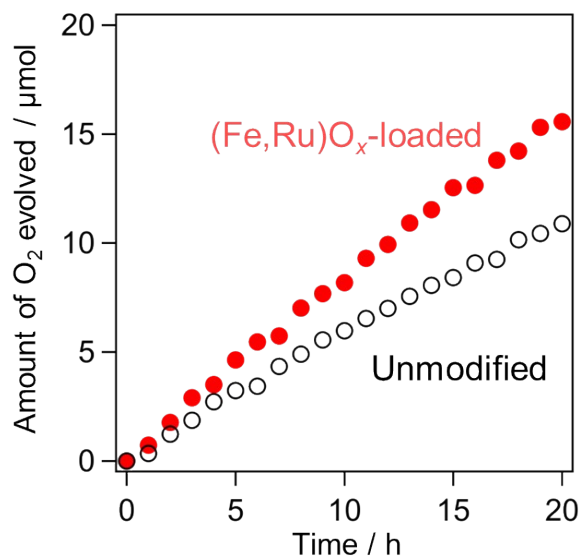

Figure S10. Photocatalytic O<sub>2</sub> evolution using unmodified or (Fe,Ru)O<sub>x</sub>-loaded PbVO<sub>3</sub>Cl in aqueous Fe(NO<sub>3</sub>)<sub>3</sub> solution (5 mM, 250 mL, pH 2.4) under visible light irradiation ( $\lambda > 400$  nm).

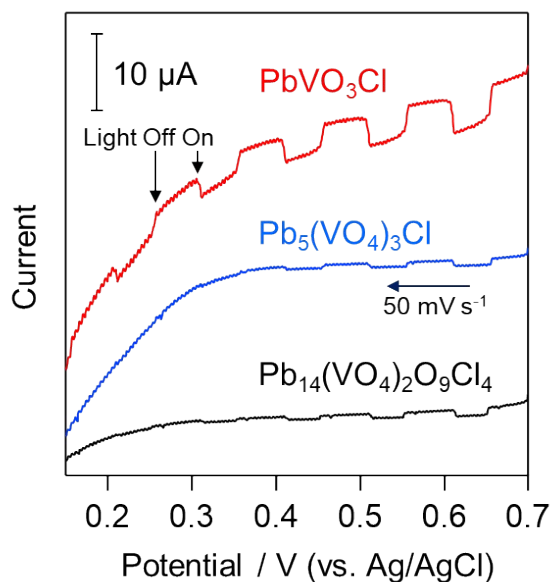

Figure S11. Current-potential curves for electrodes composed of PbVO<sub>3</sub>Cl, Pb<sub>5</sub>(VO<sub>4</sub>)<sub>3</sub>Cl, and Pb<sub>14</sub>(VO<sub>4</sub>)<sub>2</sub>O<sub>9</sub>Cl<sub>4</sub> in a phosphate-buffered solution (0.1 M, pH 6.0) under chopped visible light from a 300-W Xe lamp with a cutoff filter (L-42).

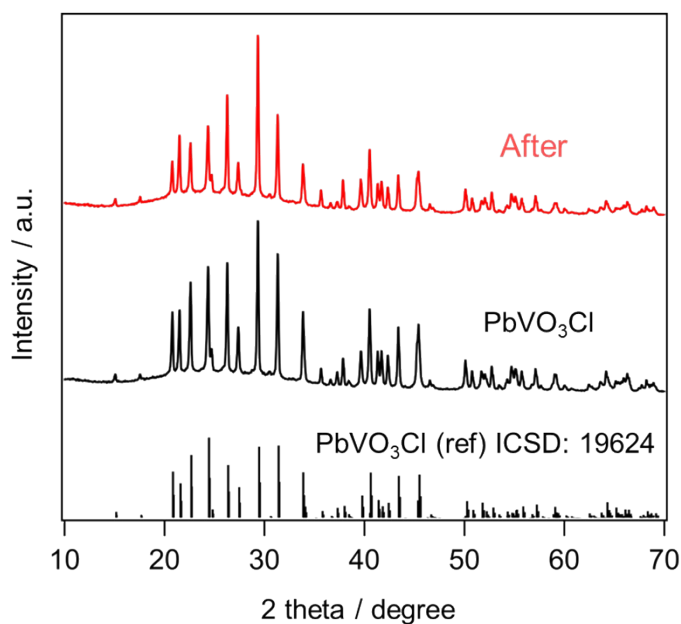

Figure S12. XRD pattern of  $(\text{Fe,Ru})\text{O}_x\text{-PbVO}_3\text{Cl}$  after photocatalytic  $\text{O}_2$  evolution in aqueous  $\text{Fe}(\text{NO}_3)_3$  solution (5 mM, 250 mL, pH 2.4) under visible light irradiation ( $\lambda > 400$  nm), shown in Figure 6a.

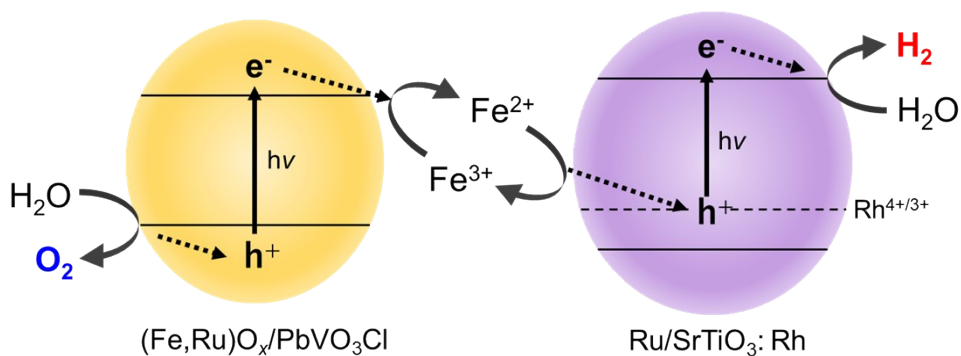

Figure S13. Schematic of Z-scheme water splitting using a mixture of  $\text{Ru/SrTiO}_3\text{:Rh}$  as a  $\text{H}_2$ -evolution photocatalyst and  $(\text{Fe,Ru})\text{O}_x\text{-PbVO}_3\text{Cl}$  as an  $\text{O}_2$ -evolution photocatalyst. The dotted arrows represent the electron flow.

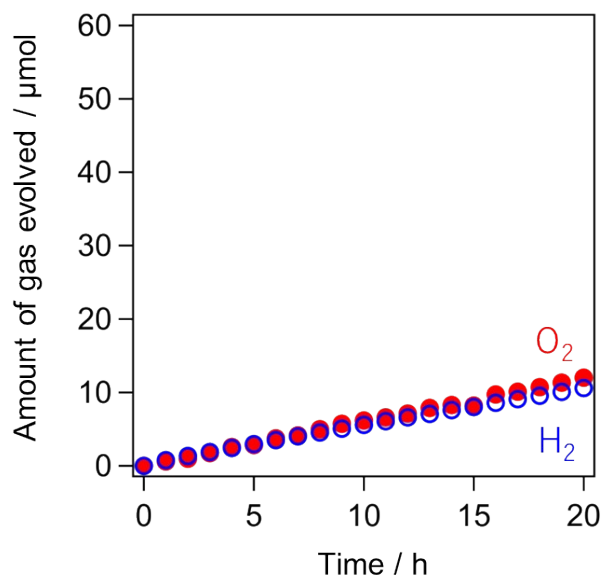

Figure S14. Time courses of photocatalytic evolution of H<sub>2</sub> and O<sub>2</sub> using a mixture of Ru/SrTiO<sub>3</sub>:Rh and (Fe,Ru)O<sub>x</sub>/PbVO<sub>3</sub>Cl under visible light ( $\lambda > 400$  nm) in an aqueous Fe(NO<sub>3</sub>)<sub>3</sub> solution (5 mM, 250 mL, pH 2.4).

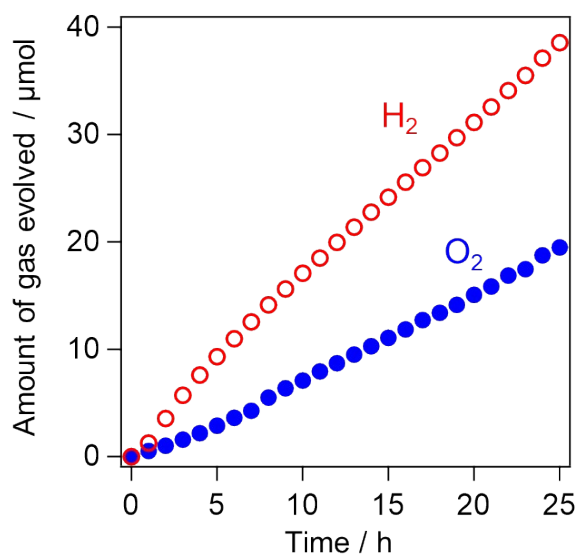

Figure S15. Z-scheme water splitting using unmodified PbVO<sub>3</sub>Cl as an OEP and Ru/SrTiO<sub>3</sub>:Rh as a HEP under visible light ( $\lambda > 400$  nm) in an aqueous Fe(ClO<sub>4</sub>)<sub>3</sub> solution (5 mM, 250 mL, pH 2.4).
